# Supplementary material for: Coordinated and Distinct Roles of Peptidoglycan Carboxypeptidases DacC and DacA in Cell Growth and Shape Maintenance under Stress Conditions
Source: PubMed Central journal article supplement (PMC10269652; doi:10.1128/spectrum.00014-23), 2023-04-26
Supplement: spectrum.00014-23-s0001.pdf [file spectrum.00014-23-s0001.pdf]

## Supplementary materials

### 1. Supplementary Figures

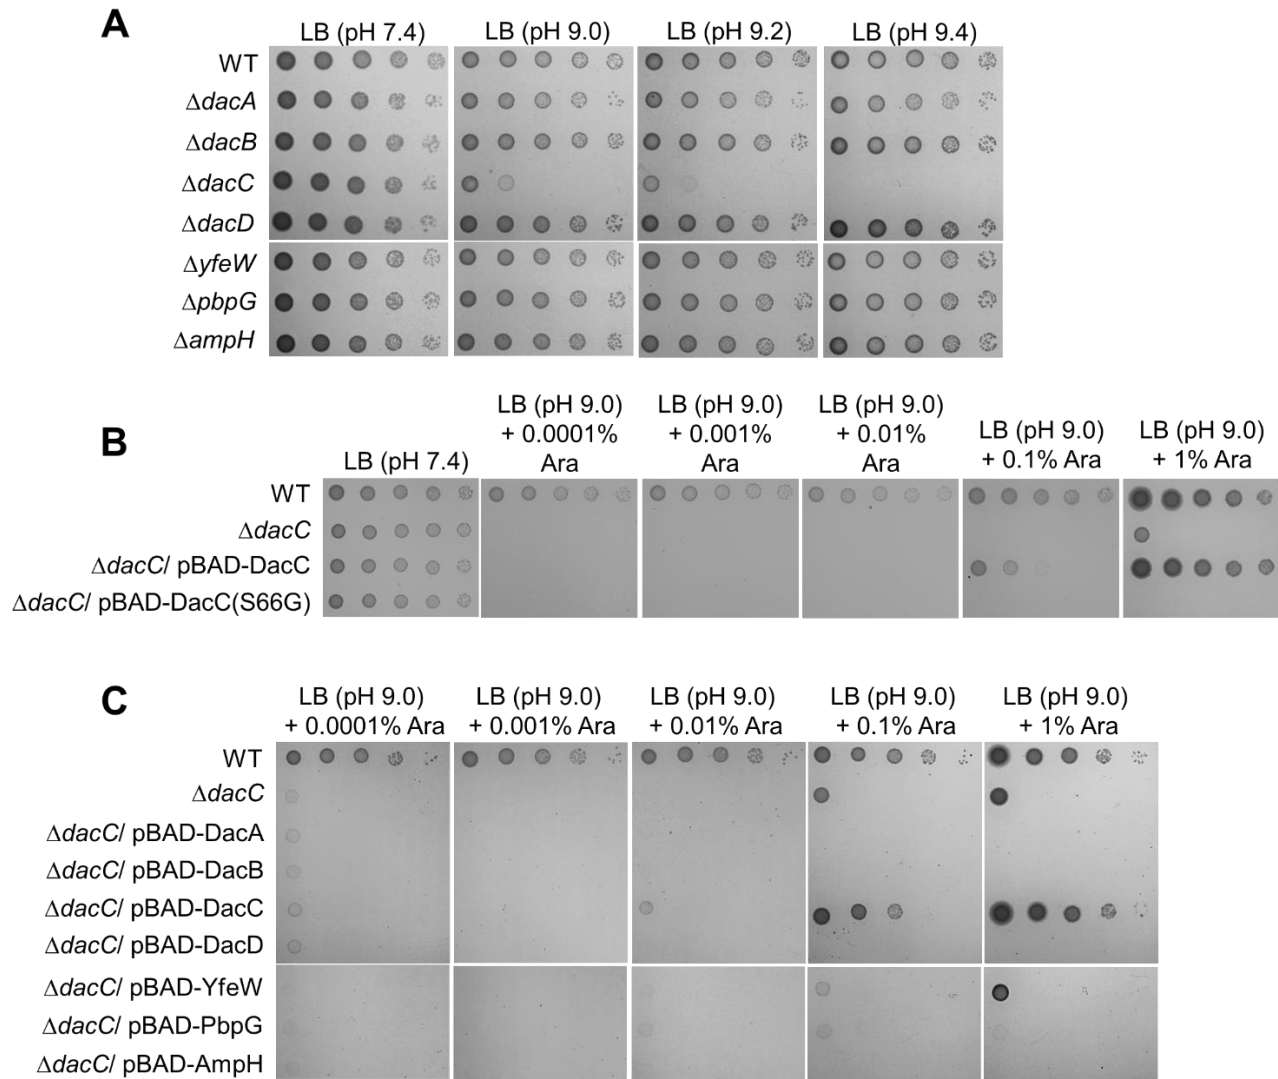

**FIG S1** The activity of DacC is required for growth under alkaline stress conditions. (A) Sensitivity of the *dacC* mutant to alkaline pH. The wild-type (WT) and indicated mutant cells were serially diluted from  $10^8$  to  $10^4$  cells/ml in 10-fold steps and spotted onto an LB plate or LB plates at indicated pH. (B) Complementation of alkaline sensitivity of the *dacC* mutant. The cells of the indicated strains were serially diluted from  $10^8$  to  $10^4$  cells/ml in 10-fold steps and spotted onto an LB plate and LB plates at pH 9.0 containing the indicated concentrations of arabinose. (C) Complementation of alkaline sensitivity of the *dacC* mutant by other DD-CPases. The cells of the indicated strains were serially

diluted from  $10^8$  to  $10^4$  cells/ml in 10-fold steps and spotted onto an LB plate and LB plates at pH 9.0 containing the indicated concentrations of arabinose.

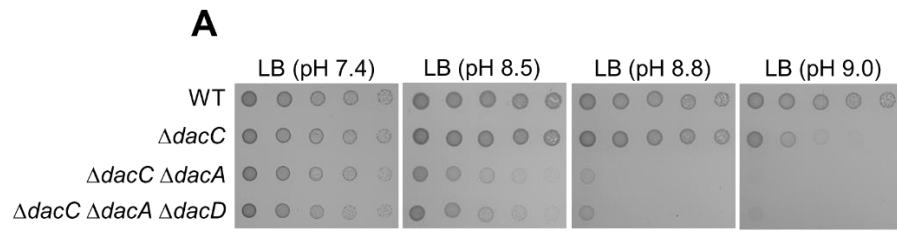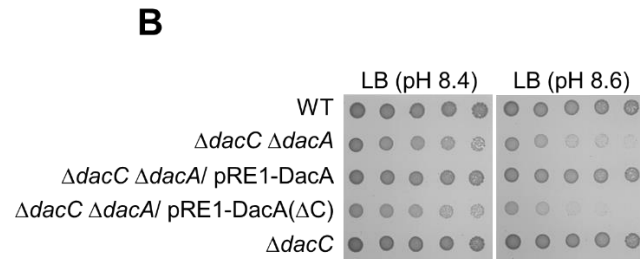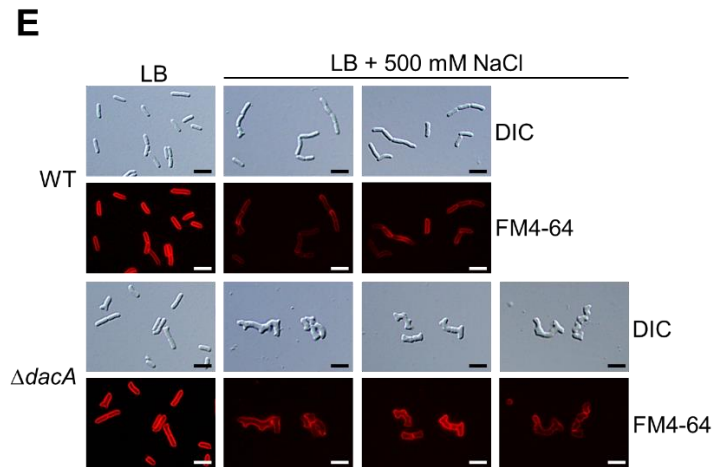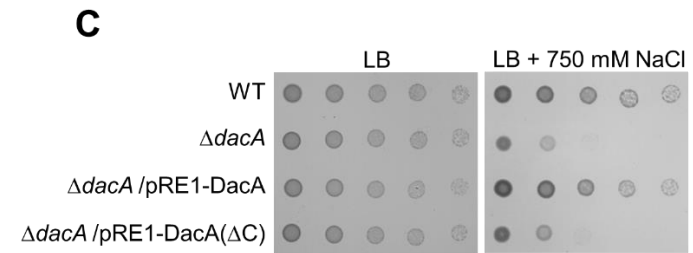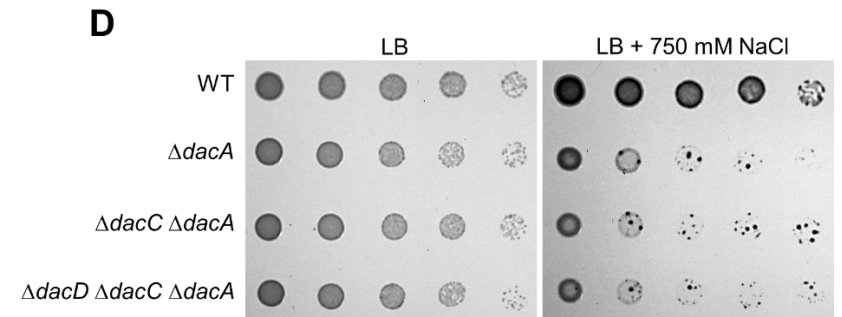

**FIG S2** Effects of DacA depletion on cell growth and morphology under alkaline and salt stresses. (A) Increased sensitivity of the *dacC* mutant to alkaline pH by additional deletion of the *dacA* gene. The wild-type (WT) and indicated mutant cells were serially diluted from  $10^8$  to  $10^4$

cells/ml in 10-fold steps and spotted onto an LB plate or LB plates at indicated pH. (B) Complementation of alkaline sensitivity of the *dacC* *dacA* double mutant. The cells of the indicated strains were serially diluted from  $10^8$  to  $10^4$  cells/ml in 10-fold steps and spotted onto an LB plate and LB plates at the indicated pH. (C) Salt sensitivity of the *dacA* mutant. The wild-type and indicated mutant cells were serially diluted from  $10^8$  to  $10^4$  cells/ml in 10-fold steps and spotted onto an LB plate (171 mM NaCl) or an LB plate containing 750 mM NaCl. (D) Only DacA is required for overcoming salt stress. The wild-type and indicated mutant cells were serially diluted from  $10^8$  to  $10^4$  cells/ml in 10-fold steps and spotted onto an LB plate or an LB plate containing 750 mM NaCl. (E) Effect of DacA depletion on morphological maintenance under salt stress. The indicated cells grown in LB medium or LB medium containing 750 mM NaCl were stained with FM4-64 (red), and then spotted on a 1% agarose pad. Scale bars, 5  $\mu$ m.

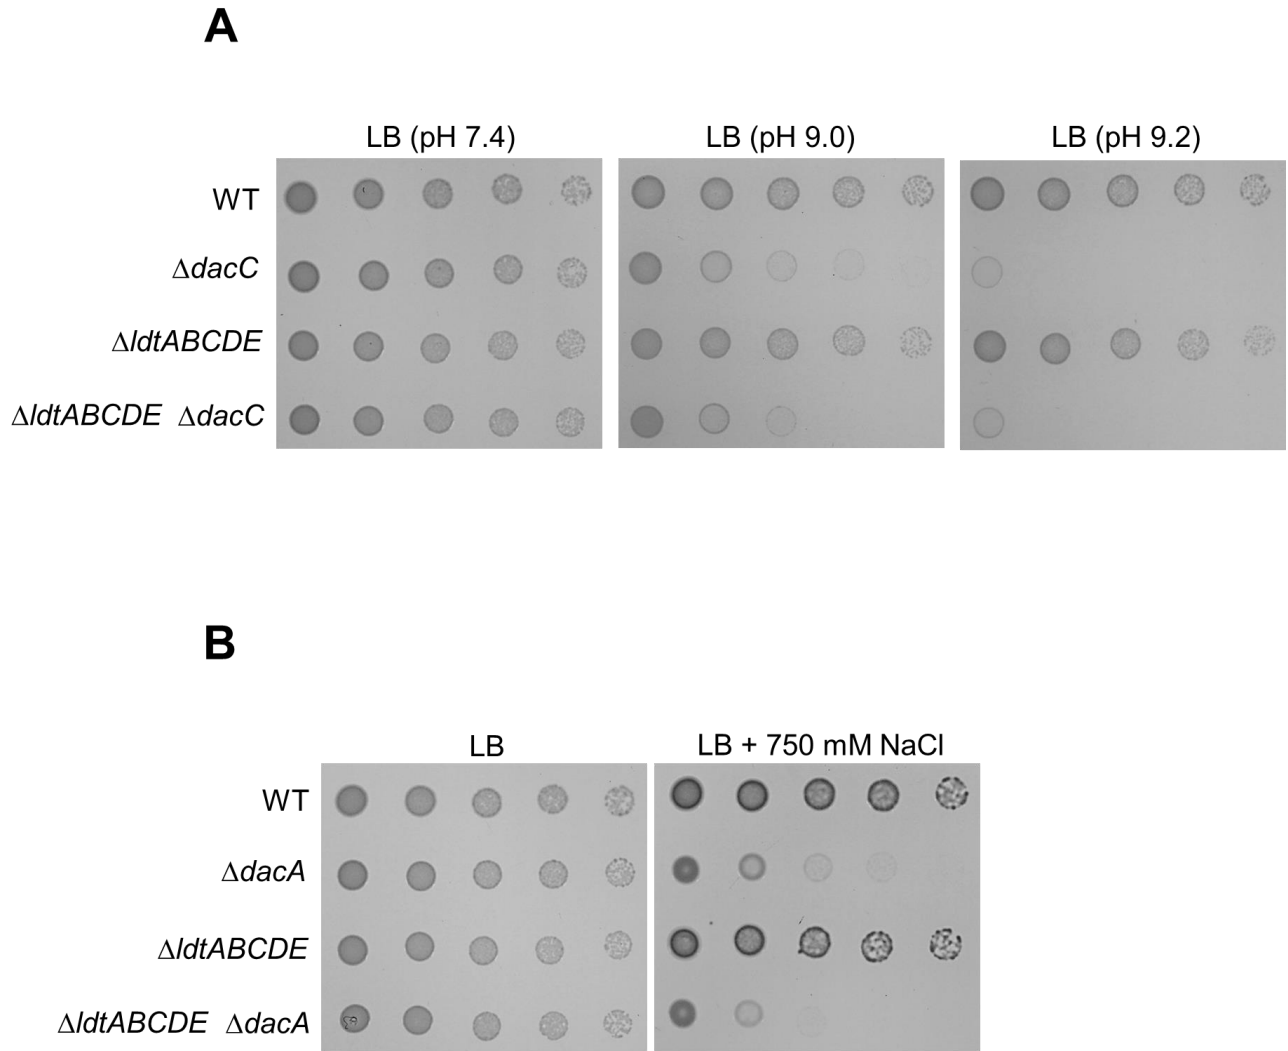

**FIG S3** Identified phenotypes of the *dacC* and *dacA* mutants are independent of LD-transpeptidases.

(A) LD-Transpeptidase-independent alkaline sensitivity of the *dacC* mutant. The wild-type (WT) and indicated mutant cells were serially diluted from  $10^8$  to  $10^4$  cells/ml in 10-fold steps and spotted onto an LB plate or LB plates at indicated pH. (B) LD-Transpeptidase-independent salt sensitivity of the *dacA* mutant. The wild-type and indicated mutant cells were serially diluted from  $10^8$  to  $10^4$  cells/ml in 10-fold steps and spotted onto an LB plate or an LB plate containing 750 mM NaCl.

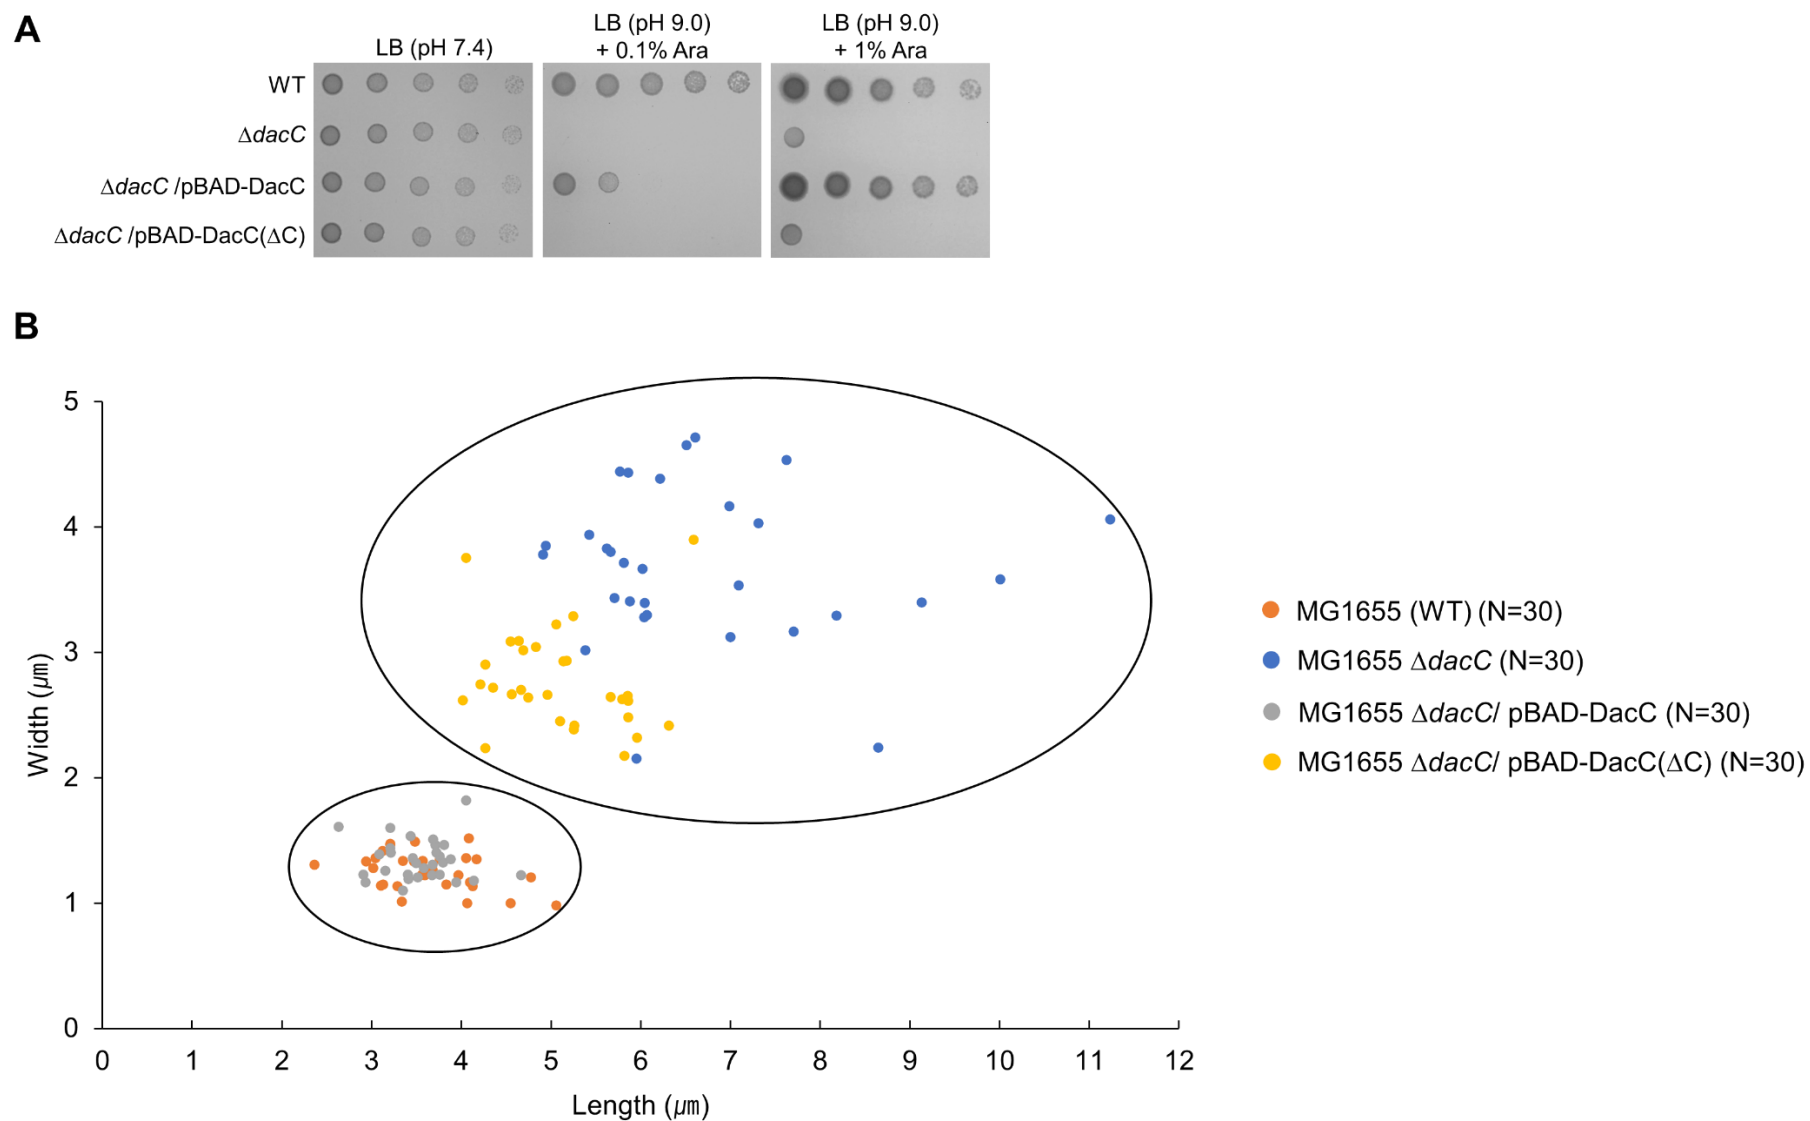

**FIG S4** The C-terminal domain of DacC is necessary for cell growth and morphology under alkaline stress. (A) The C-terminal domain of DacC is necessary for bacterial growth under alkaline stress. The wild-type (WT) and indicated mutant cells were serially diluted from  $10^8$  to

$10^4$  cells/ml in 10-fold steps and spotted onto an LB plate or LB plate at pH 9.0 containing 0.1% or 1% arabinose. (B) Length and width distribution for cells grown in LB medium at pH 9.0. N indicates the number of cells.

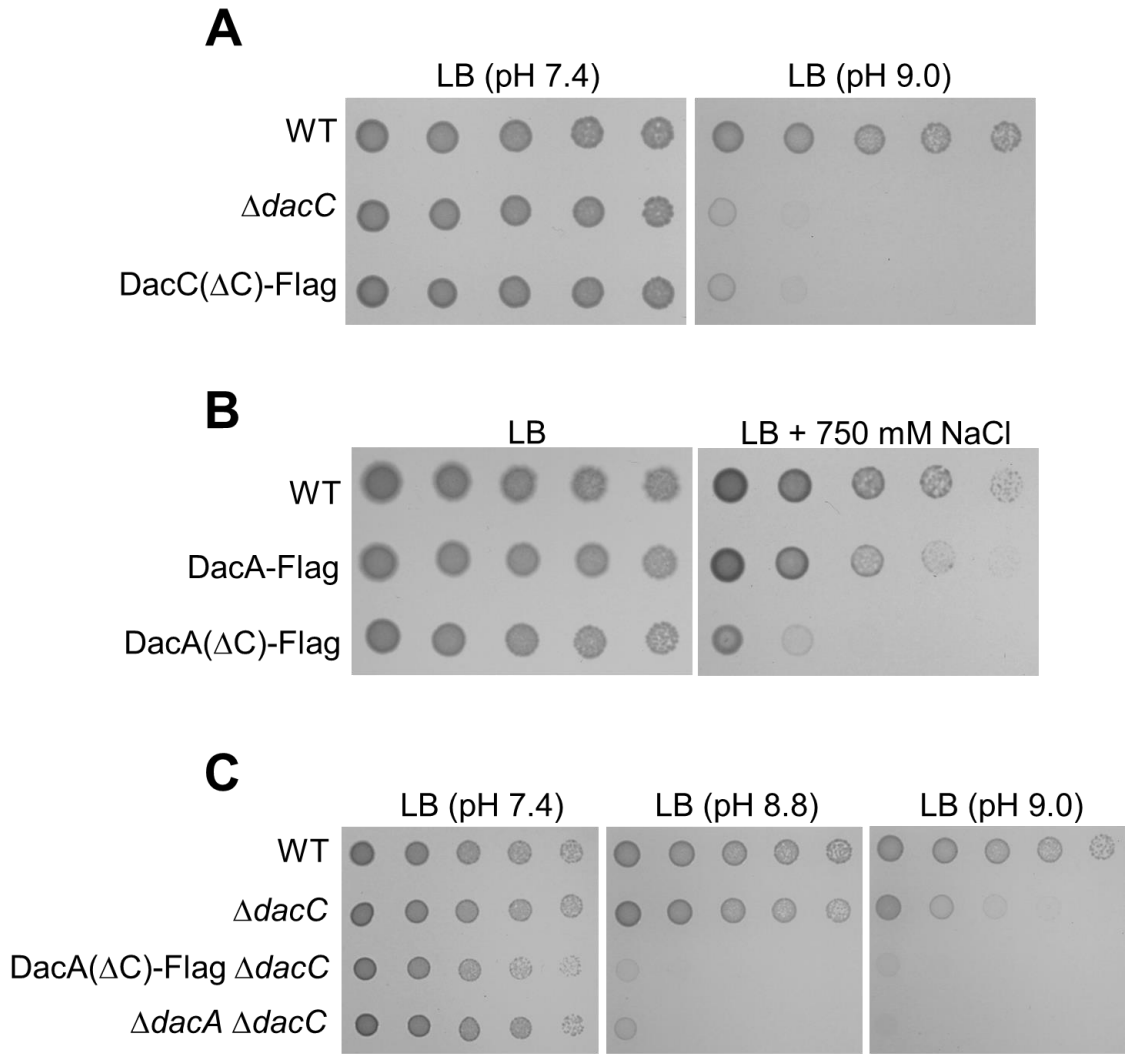

**FIG S5** Phenotypes of the MG1655 DacC( $\Delta C$ )-Flag and MG1655 DacA( $\Delta C$ )-Flag strains. (A) Sensitivity of the MG1655 DacC( $\Delta C$ )-Flag strain to alkaline pH. The wild-type (WT) and indicated mutant cells were serially diluted from  $10^8$  to  $10^4$  cells/ml in 10-fold steps and spotted onto an LB plate or LB plate at pH 9.0. (B) Salt sensitivity of the MG1655 DacA( $\Delta C$ )-Flag strain. The wild-type and indicated mutant cells were serially diluted from  $10^8$  to  $10^4$  cells/ml in 10-fold steps and spotted onto an LB plate or LB plate containing 750 mM NaCl. (C) Phenotype of the MG1655 DacA( $\Delta C$ )-Flag  $\Delta dacC$  strain under alkaline stress conditions. The wild-type and indicated mutant cells were serially diluted from  $10^8$  to  $10^4$  cells/ml in 10-fold steps and spotted onto an LB plate or LB plates at the indicated pH.



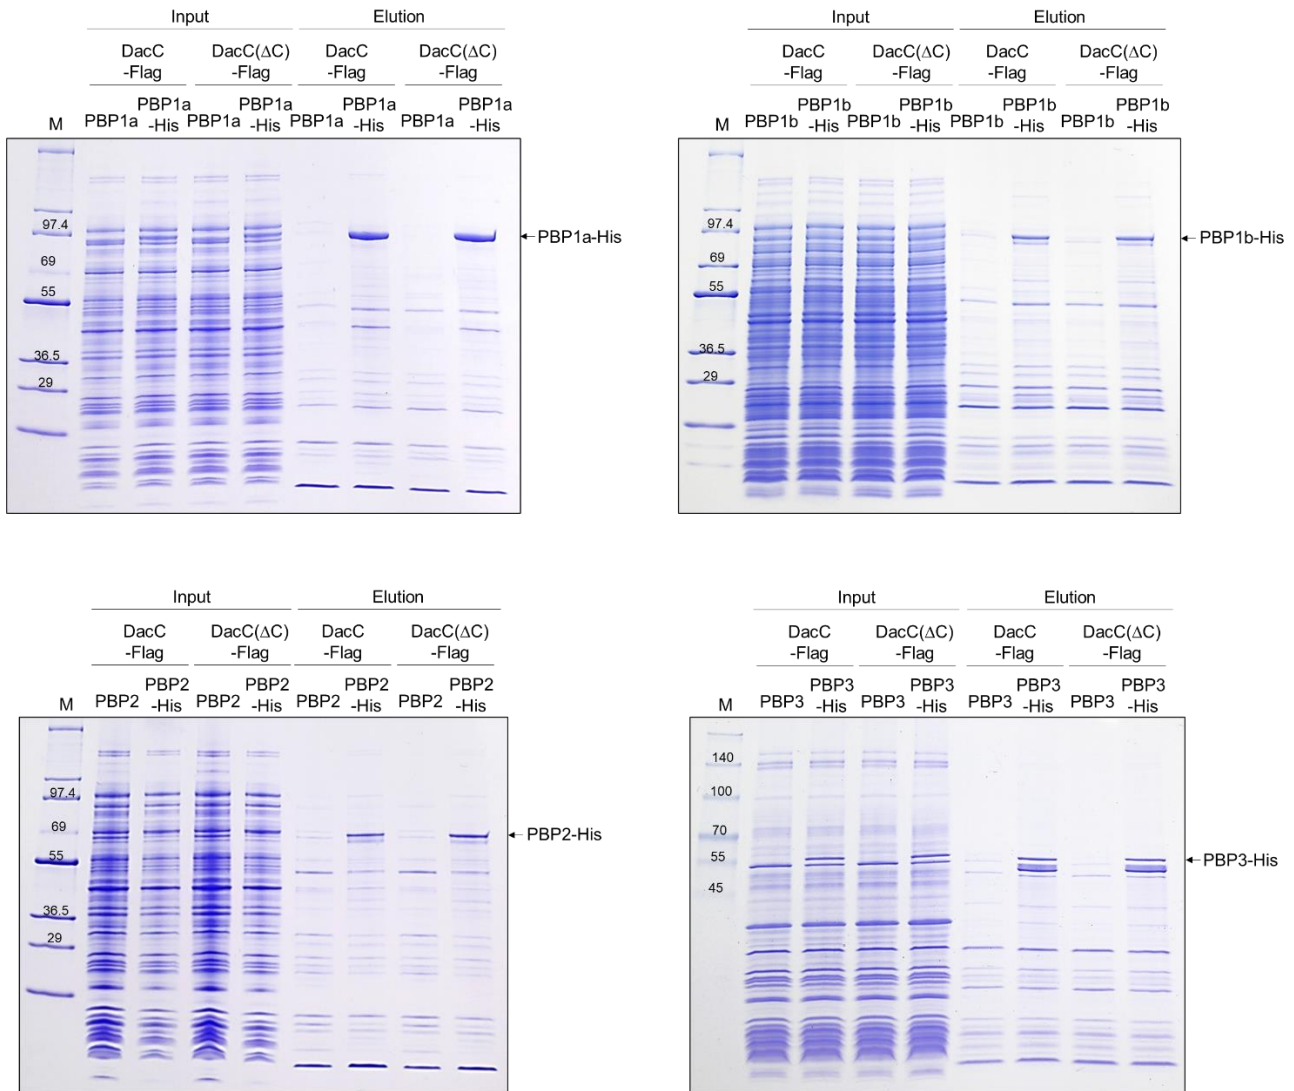

**FIG S6** SDS-PAGE gels of pull-down experiments of DacC. The supernatant of MG1655 DacC-Flag or DacC( $\Delta$ C)-Flag cells harboring the pBAD-based plasmids expressing C-terminal His-tagged PBPs or non-tagged PBPs was loaded onto Talon metal affinity resin. After pull-down experiments, the amount of input (Input) and output (Elution) total proteins was measured by SDS-PAGE using 4–20% gradient Tris-glycine polyacrylamide gels (KOMA biotech, Korea). Arrows indicate purified His-tagged PBPs. Lane M indicates EzWay Protein Blue MW Marker (KOMA Biotech., Korea) or EzWay Protein PreBlue Ladder (KOMA Biotech., Korea).

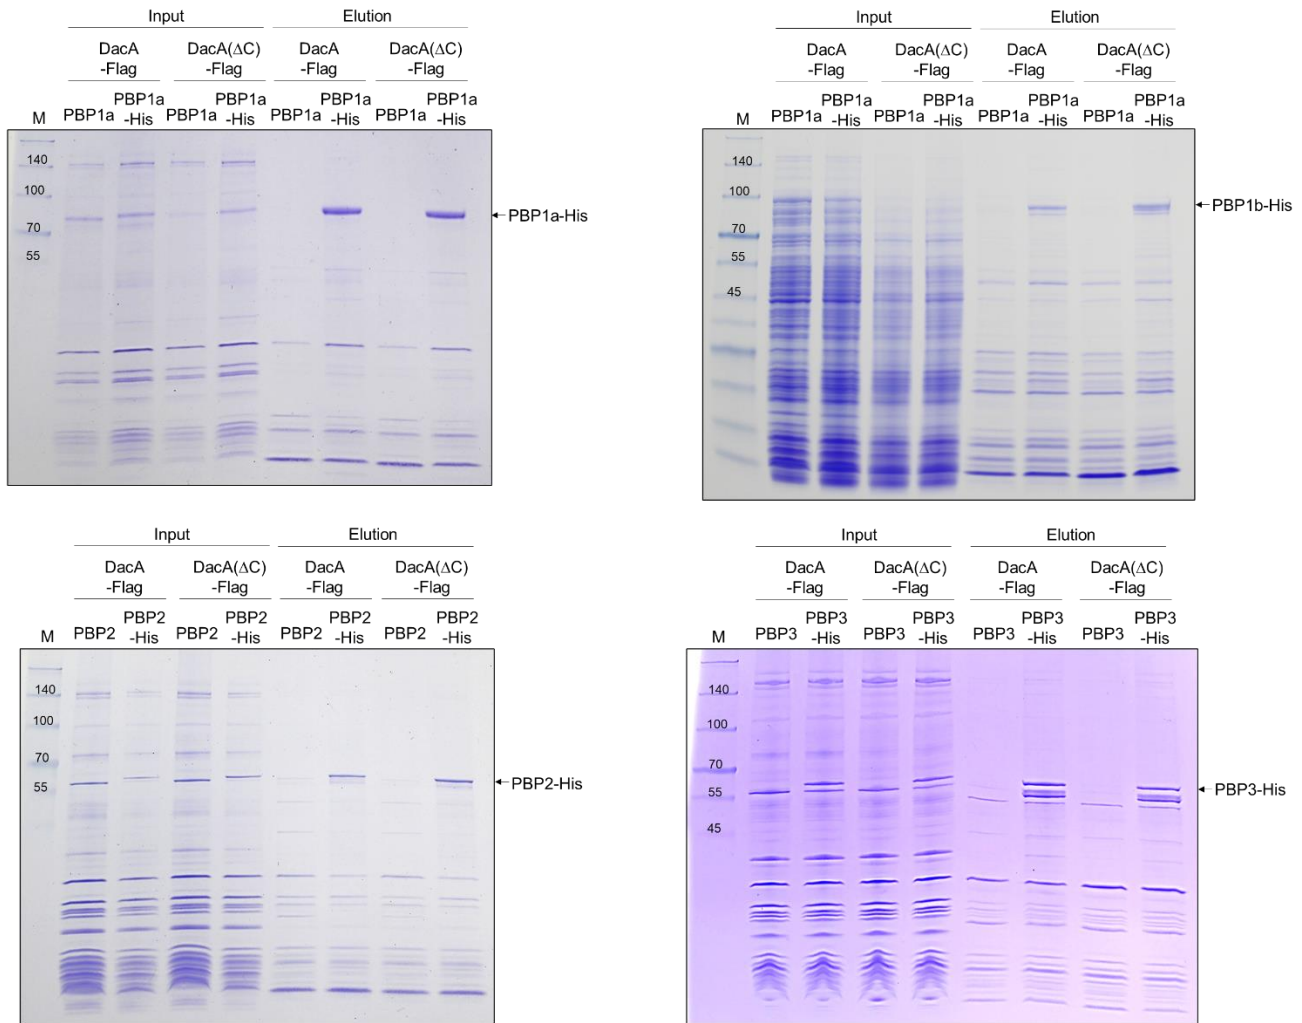

**FIG S7** SDS-PAGE gels of pull-down experiments of DacA. The supernatant of MG1655 DacA-Flag or DacA( $\Delta$ C)-Flag cells harboring the pBAD-based plasmids expressing C-terminal His-tagged PBPs or non-tagged PBPs was loaded onto Talon metal affinity resin. After pull-down experiments, the amount of input (Input) and output (Elution) total proteins was measured by SDS-PAGE using 4–20% gradient Tris-glycine polyacrylamide gels (KOMA biotech, Korea). Arrows indicate purified His-tagged PBPs. Lane M indicates EzWay Protein PreBlue Ladder (KOMA Biotech., Korea).

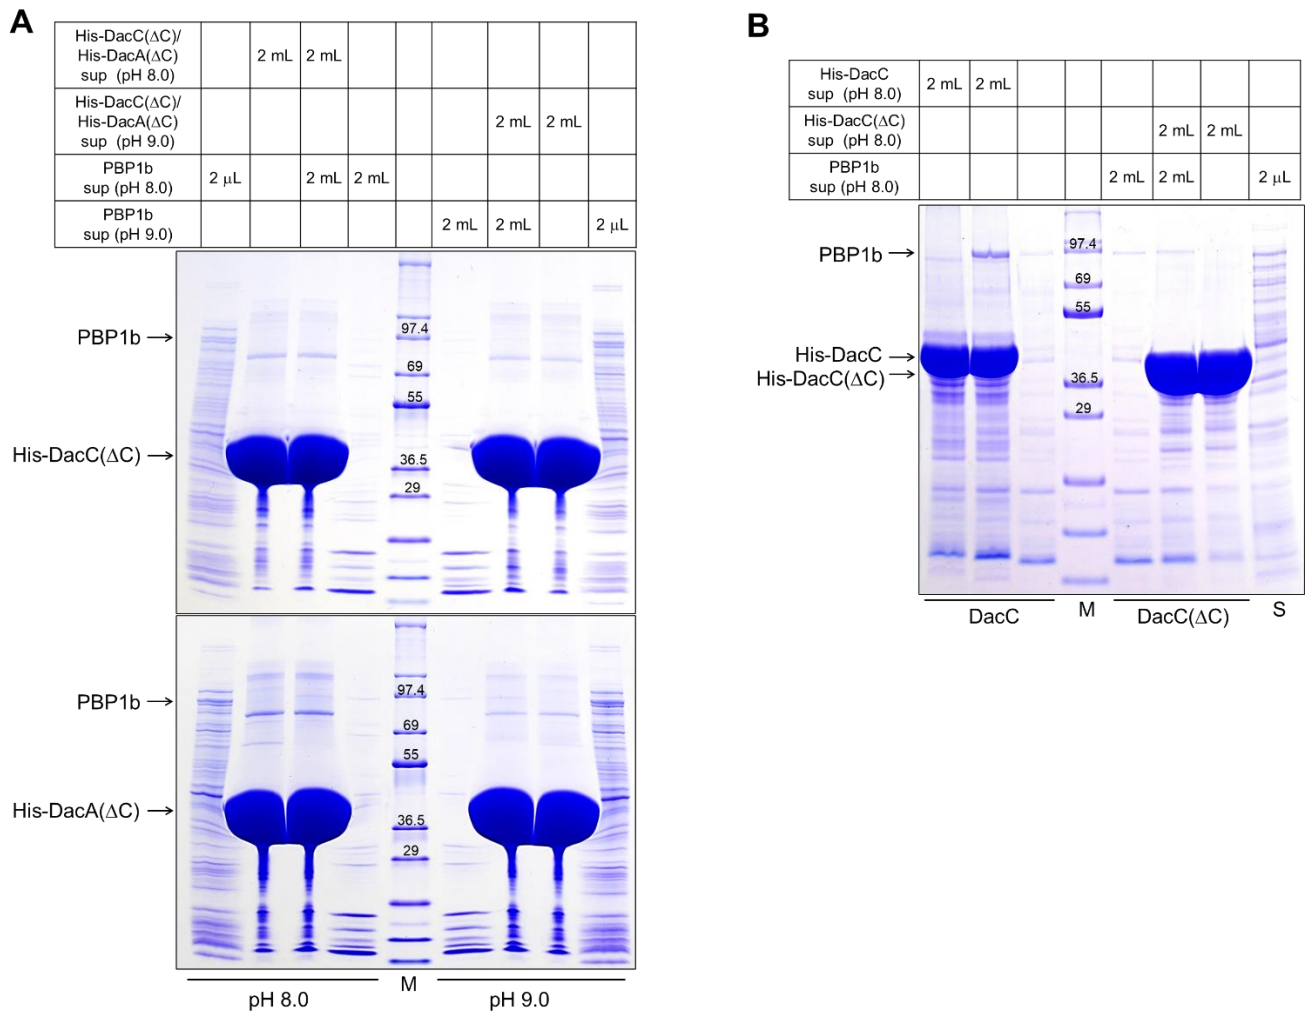

**FIG S8** The importance of the C-terminal domain of DacC and DacA for its interaction with PBP1b. (A) PBP1b does not interact with DacC( $\Delta$ C) and DacA( $\Delta$ C) regardless of pH conditions. The supernatant of ER2566 cells harboring the pET24a plasmid expressing PBP1b was mixed with the supernatant of ER2566 cells harboring pET28a plasmid expressing His-tagged DacC( $\Delta$ C) or His-tagged DacA( $\Delta$ C) at pH 8.0 or 9.0. After pull-down experiments, eluted proteins were separated on 4–20% gradient Tris-glycine polyacrylamide gels and were visualized by staining with Coomassie brilliant blue R. Lane M indicates EzWay Protein Blue MW Marker (KOMA Biotech., Korea). Lane S indicates the supernatant of ER2566 cells overexpressing PBP1b. (B) PBP1b interacts with DacC, but not DacC( $\Delta$ C). The supernatant of ER2566 cells harboring the pET24a plasmid expressing PBP1b was mixed with the supernatant of ER2566 cells harboring pET28a plasmid expressing His-tagged

DacA or His-tagged DacA( $\Delta$ C) at pH 8.0. After pull-down experiments, eluted proteins were separated on 4–20% gradient Tris-glycine polyacrylamide gels and were visualized by staining with Coomassie brilliant blue R. Lane M indicates EzWay Protein Blue MW Marker (KOMA Biotech., Korea). Lane S indicates the supernatant of ER2566 cells overexpressing PBP1b.

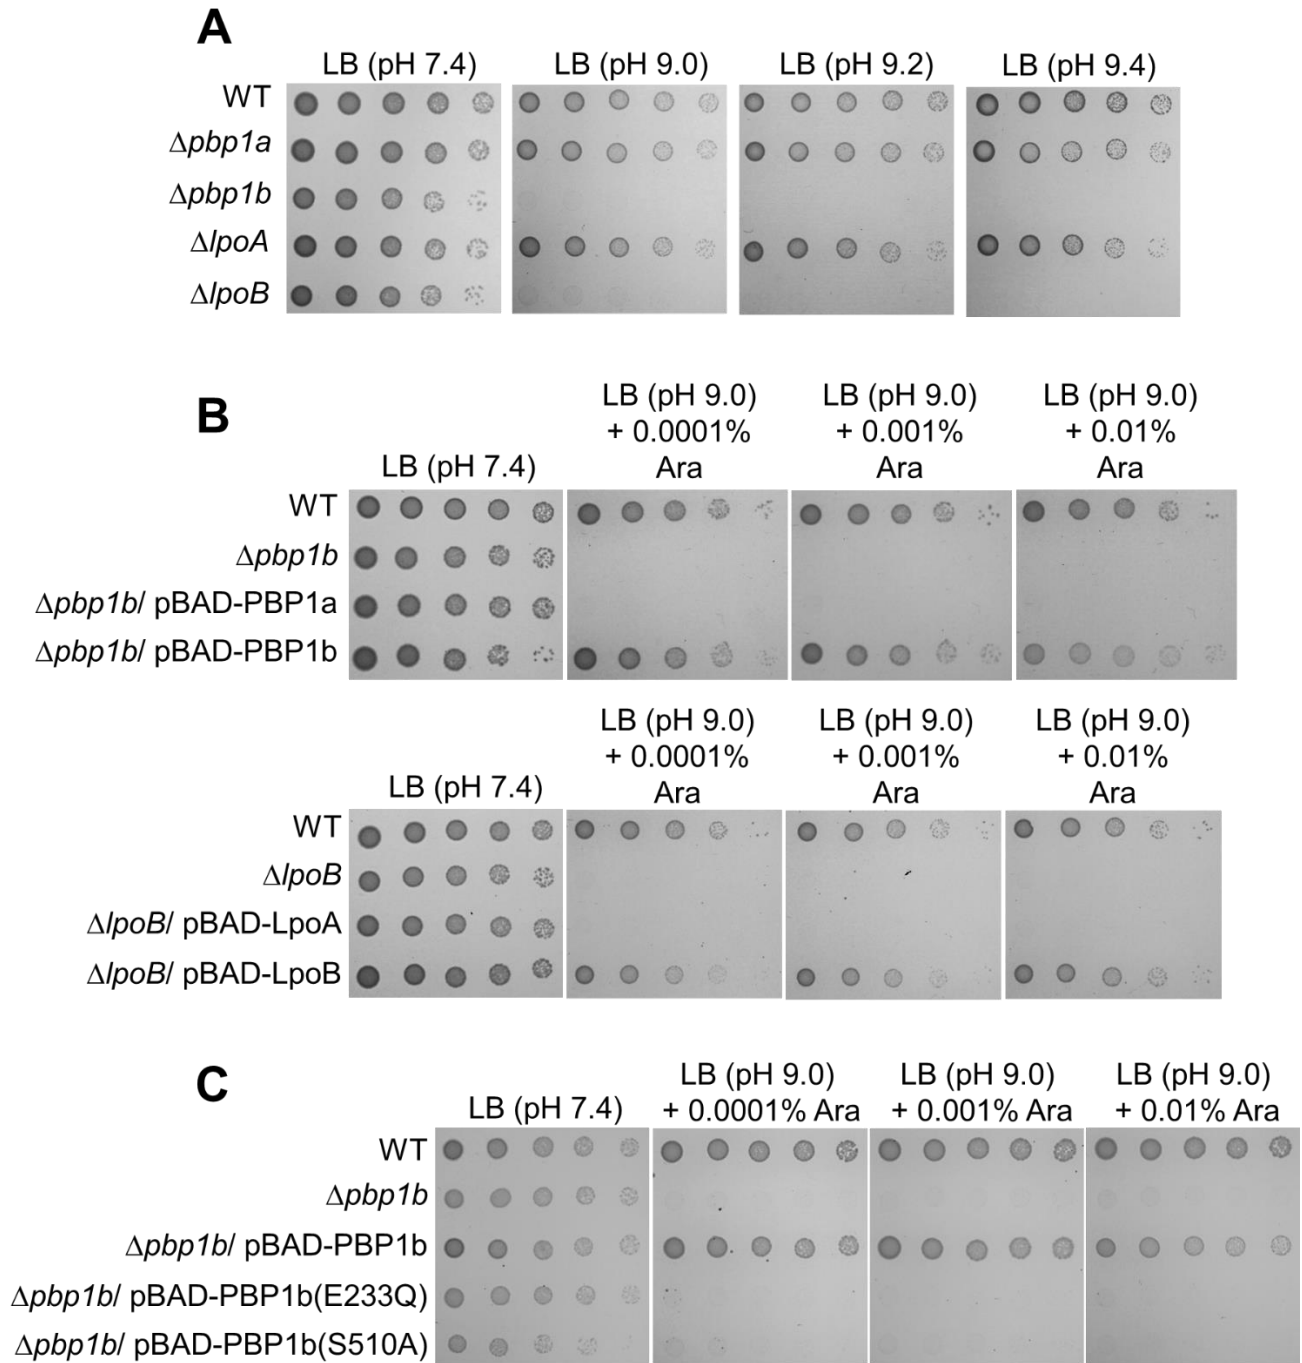

**FIG S9** aPBP is required for cell growth under alkaline stress. (A) Sensitivity of *mrcB* and *lpoB* mutants to alkaline stress. The wild-type (WT) and indicated mutant cells were serially diluted from  $10^8$  to  $10^4$  cells/ml in 10-fold steps and spotted onto an LB plate or LB plates at the indicated pH. (B) Complementation of alkaline sensitivity of *mrcB* and *lpoB* mutants. The cells of the indicated strains were serially diluted from  $10^8$  to  $10^4$  cells/ml in 10-fold steps and spotted onto an LB plate and LB

plates at pH 9.0 containing the indicated concentrations of arabinose. (C) Requirement of the DD-transpeptidase activity of PBP1b for overcoming alkaline stress. The cells of the indicated strains were serially diluted from  $10^8$  to  $10^4$  cells/ml in 10-fold steps and spotted onto an LB plate and LB plates at pH 9.0 containing the indicated concentrations of arabinose.

## 2. Supplementary Tables

**Supplementary Table S1. *Escherichia coli* strains and plasmids used in this study.**

| Strain or plasmid                                | Genotype or phenotype                                                                                                                                              | Source or Reference             |
|--------------------------------------------------|--------------------------------------------------------------------------------------------------------------------------------------------------------------------|---------------------------------|
| <b>Strains</b>                                   |                                                                                                                                                                    |                                 |
| MG1655                                           | F <sup>-</sup> λ <sup>-</sup> <i>ilvG</i> <sup>-</sup> <i>rfb</i> -50 <i>rph</i> -1. Wild type <i>E. coli</i> K-12                                                 | (Blattner <i>et al.</i> , 1997) |
| MG1655 Δ <i>dacA</i>                             | MG1655 <i>dacA</i> :: <i>frt</i>                                                                                                                                   | (Park <i>et al.</i> , 2022)     |
| MG1655 Δ <i>dacB</i>                             | MG1655 <i>dacB</i> :: <i>frt</i>                                                                                                                                   | (Park <i>et al.</i> , 2020)     |
| MG1655 Δ <i>dacC</i>                             | MG1655 <i>dacC</i> :: <i>frt</i>                                                                                                                                   | (Park <i>et al.</i> , 2022)     |
| MG1655 Δ <i>dacD</i>                             | MG1655 <i>dacD</i> :: <i>frt</i>                                                                                                                                   | (Park <i>et al.</i> , 2022)     |
| MG1655 Δ <i>pbpG</i>                             | MG1655 <i>pbpG</i> :: <i>frt</i>                                                                                                                                   | (Park <i>et al.</i> , 2020)     |
| MG1655 Δ <i>ampH</i>                             | MG1655 <i>ampH</i> :: <i>frt</i>                                                                                                                                   | (Park <i>et al.</i> , 2020)     |
| MG1655 Δ <i>yfeW</i>                             | MG1655 <i>yfeW</i> :: <i>frt</i>                                                                                                                                   | (Park <i>et al.</i> , 2022)     |
| MG1655 Δ <i>dacC</i> Δ <i>dacA</i>               | MG1655 <i>dacC</i> :: <i>frt</i> <i>dacA</i> :: <i>frt</i>                                                                                                         | This study                      |
| MG1655 Δ <i>dacC</i> Δ <i>dacA</i> Δ <i>dacD</i> | MG1655 <i>dacC</i> :: <i>frt</i> <i>dacA</i> :: <i>frt</i> <i>dacD</i> :: <i>frt</i>                                                                               | This study                      |
| MG1655 Δ <i>ldtABCDE</i>                         | MG1655 <i>ldtA</i> :: <i>frt</i> <i>ldtB</i> :: <i>frt</i> <i>ldtC</i> :: <i>frt</i> <i>ldtD</i> :: <i>frt</i> <i>ldtE</i> :: <i>frt</i>                           | This study                      |
| MG1655 Δ <i>dacA</i> Δ <i>ldtABCDE</i>           | MG1655 <i>ldtA</i> :: <i>frt</i> <i>ldtB</i> :: <i>frt</i> <i>ldtC</i> :: <i>frt</i> <i>ldtD</i> :: <i>frt</i> <i>ldtE</i> :: <i>frt</i> <i>dacA</i> :: <i>frt</i> | This study                      |
| MG1655 Δ <i>dacC</i> Δ <i>ldtABCDE</i>           | MG1655 <i>ldtA</i> :: <i>frt</i> <i>ldtB</i> :: <i>frt</i> <i>ldtC</i> :: <i>frt</i> <i>ldtD</i> :: <i>frt</i> <i>ldtE</i> :: <i>frt</i> <i>dacC</i> :: <i>frt</i> | This study                      |
| MG1655Δ <i>mrcA</i>                              | MG1655 <i>mrcA</i> :: <i>frt</i>                                                                                                                                   | (Park <i>et al.</i> , 2020)     |
| MG1655Δ <i>mrcB</i>                              | MG1655 <i>mrcB</i> :: <i>frt</i>                                                                                                                                   | (Park <i>et al.</i> , 2020)     |
| MG1655Δ <i>lpoA</i>                              | MG1655 <i>lpoA</i> :: <i>frt</i>                                                                                                                                   | (Park <i>et al.</i> , 2020)     |

|                                                       |                                                                                                                                                                                                                                                                |                             |
|-------------------------------------------------------|----------------------------------------------------------------------------------------------------------------------------------------------------------------------------------------------------------------------------------------------------------------|-----------------------------|
| MG1655 $\Delta$ <i>lpoB</i>                           | MG1655 <i>lpoB</i> :: <i>frt</i>                                                                                                                                                                                                                               | (Park <i>et al.</i> , 2020) |
| MG1655 DacA-Flag                                      | MG1655 <i>dacA</i> -3xFLAG, Cm <sup>R</sup>                                                                                                                                                                                                                    | (Park <i>et al.</i> , 2022) |
| MG1655 DacA( $\Delta$ C)-Flag                         | MG1655 DacA(1-385)-3xFLAG                                                                                                                                                                                                                                      | (Park <i>et al.</i> , 2022) |
| MG1655 DacC-Flag                                      | MG1655 <i>dacC</i> -3xFLAG, Cm <sup>R</sup>                                                                                                                                                                                                                    | This study                  |
| MG1655 DacC( $\Delta$ C)-Flag                         | MG1655 DacC(1-378)-3xFLAG, Cm <sup>R</sup>                                                                                                                                                                                                                     | This study                  |
| MG1655 DacD-Flag                                      | MG1655 <i>dacD</i> -3xFLAG, Cm <sup>R</sup>                                                                                                                                                                                                                    | This study                  |
| MG1655 DacA( $\Delta$ C)-Flag<br>$\Delta$ <i>dacC</i> | MG1655 DacA(1-385)-3xFLAG <i>dacC</i> :: <i>frt</i>                                                                                                                                                                                                            | This study                  |
| ER2566                                                | F- $\lambda$ - <i>fhuA2</i> [ <i>lon</i> ] <i>ompT lacZ</i> ::T7 gene 1 gal <i>sulA11</i><br>$\Delta$ ( <i>mcrC-mrr</i> )114:: <i>IS10</i> R( <i>mcr-73</i> :: <i>miniTn10-TetS</i> )2<br>R( <i>zgb-210</i> :: <i>Tn10</i> )(TetS) <i>endA1</i> [ <i>dcm</i> ] | New England Biolabs         |
| <b>Plasmids</b>                                       |                                                                                                                                                                                                                                                                |                             |
| pBAD24                                                | Expression vector under control of arabinose-inducible promoter, Amp <sup>r</sup>                                                                                                                                                                              | Addgene                     |
| pBAD24(cm)                                            | pBAD24-based expression vector, Cm <sup>r</sup>                                                                                                                                                                                                                | (Park <i>et al.</i> , 2020) |
| pBAD-Flag                                             | pBAD24(cm)-based expression vector for the 3xFlag tag, Cm <sup>r</sup>                                                                                                                                                                                         | (Park <i>et al.</i> , 2020) |
| pBAD-DacA                                             | pBAD24(cm)-based expression vector for DacA, Cm <sup>r</sup>                                                                                                                                                                                                   | (Park <i>et al.</i> , 2022) |
| pBAD-DacB                                             | pBAD24(cm)-based expression vector for DacB, Cm <sup>r</sup>                                                                                                                                                                                                   | (Park <i>et al.</i> , 2020) |
| pBAD-DacC                                             | pBAD24(cm)-based expression vector for DacC, Cm <sup>r</sup>                                                                                                                                                                                                   | (Park <i>et al.</i> , 2022) |
| pBAD-DacD                                             | pBAD24(cm)-based expression vector for DacD, Cm <sup>r</sup>                                                                                                                                                                                                   | (Park <i>et al.</i> , 2022) |
| pBAD-YfeW                                             | pBAD24(cm)-based expression vector for YfeW, Cm <sup>r</sup>                                                                                                                                                                                                   | (Park <i>et al.</i> , 2022) |
| pBAD-PbpG                                             | pBAD24(cm)-based expression vector for PbpG, Cm <sup>r</sup>                                                                                                                                                                                                   | (Park <i>et al.</i> , 2020) |



|                        |                                                                                            |                             |
|------------------------|--------------------------------------------------------------------------------------------|-----------------------------|
| pBAD-AmpH              | pBAD24(cm)-based expression vector for AmpH, Cm <sup>r</sup>                               | (Park <i>et al.</i> , 2020) |
| pBAD-DacA( $\Delta$ C) | pBAD24(cm)-based expression vector for DacA(1-385), Cm <sup>r</sup>                        | This study                  |
| pBAD-DacC( $\Delta$ C) | pBAD24(cm)-based expression vector for DacC(1-378), Cm <sup>r</sup>                        | This study                  |
| pBAD-DacC(S66G)        | pBAD24(cm)-based expression vector for DacC(S66G), Cm <sup>r</sup>                         | This study                  |
| pBAD-PBP1a             | pBAD24(cm)-based expression vector for PBP1a, Cm <sup>r</sup>                              | (Park <i>et al.</i> , 2020) |
| pBAD-PBP1a-His         | pBAD24(cm)-based expression vector for PBP1a with N-terminal 6 histidines, Cm <sup>r</sup> | This study                  |
| pBAD-PBP1b             | pBAD24(cm)-based expression vector for PBP1b, Cm <sup>r</sup>                              | (Park <i>et al.</i> , 2020) |
| pBAD-PBP1b-His         | pBAD24(cm)-based expression vector for PBP1b with N-terminal 6 histidines, Cm <sup>r</sup> | This study                  |
| pBAD-PBP2              | pBAD24(cm)-based expression vector for PBP2, Cm <sup>r</sup>                               | This study                  |
| pBAD-PBP2-His          | pBAD24(cm)-based expression vector for PBP2 with N-terminal 6 histidines, Cm <sup>r</sup>  | This study                  |
| pBAD-PBP3              | pBAD24(cm)-based expression vector for PBP3, Cm <sup>r</sup>                               | This study                  |
| pBAD-PBP3-His          | pBAD24(cm)-based expression vector for PBP3 with N-terminal 6 histidines, Cm <sup>r</sup>  | This study                  |
| pBAD-LpoA              | pBAD24(cm)-based expression vector for LpoA, Cm <sup>r</sup>                               | (Park <i>et al.</i> , 2020) |
| pBAD-LpoB              | pBAD24(cm)-based expression vector for LpoB, Cm <sup>r</sup>                               | (Park <i>et al.</i> , 2020) |
| pBAD-PBP1b(E233Q)      | pBAD24(cm)-based expression vector for PBP1b(E233Q), Cm <sup>r</sup>                       | This study                  |
| pBAD-PBP1b(S510A)      | pBAD24(cm)-based expression vector for PBP1b(S510A), Cm <sup>r</sup>                       | This study                  |

|                   |                                                                                                                |                              |
|-------------------|----------------------------------------------------------------------------------------------------------------|------------------------------|
| pBAD-Flag-FRT-Kan | pBAD24(cm)-based expression vector containing the 3xFlag tag, FRT-Km <sup>r</sup> , Cm <sup>r</sup>            | (Park <i>et al.</i> , 2022)  |
| pKD13             | Template plasmid for the amplification of the kanamycin-resistance gene bordered by FRT sites, Km <sup>r</sup> | (Datsenko and Wanner, 2000)  |
| pKD46             | λ Red recombinase expression plasmid Ts replicon, Amp <sup>r</sup>                                             | (Datsenko and Wanner, 2000)  |
| pCP20             | FLP helper plasmid Ts replicon, Amp <sup>r</sup> , Cm <sup>r</sup>                                             | (Datsenko and Wanner, 2000)  |
| pET28a            | Expression vector under control of T7 promoter, Km <sup>r</sup>                                                | Novagen                      |
| pET24a            | Expression vector under control of T7 promoter, Km <sup>r</sup>                                                | Novagen                      |
| pET24a-PBP1b      | pET24a-based expression vector for PBP1b, Km <sup>r</sup>                                                      | (Park <i>et al.</i> , 2022)  |
| pET28a-DacA       | pET28a-based expression vector for DacA(30-403) with N-terminal 6 histidines, Km <sup>r</sup>                  | (Park <i>et al.</i> , 2022)  |
| pET28a-DacA(ΔC)   | pET28a-based expression vector for DacA(30-385) with N-terminal 6 histidines, Km <sup>r</sup>                  | (Park <i>et al.</i> , 2022)  |
| pET28a-DacC       | pET28a-based expression vector for DacC(28-400) with N-terminal 6 histidines, Km <sup>r</sup>                  | This study                   |
| pET28a-DacC(ΔC)   | pET28a-based expression vector for DacC(28-378) with N-terminal 6 histidines, Km <sup>r</sup>                  | This study                   |
| pRE1              | Expression vector under control of promoter, Amp <sup>r</sup>                                                  | (Reddy <i>et al.</i> , 1989) |
| pRE1(kan)         | Expression vector under control of promoter, Km <sup>r</sup>                                                   | (Park <i>et al.</i> , 2022)  |
| pRE1-DacA         | pRE1-based expression vector for DacA, Km <sup>r</sup>                                                         | (Park <i>et al.</i> , 2022)  |
| pRE1-DacA(ΔC)     | pRE1-based expression vector for DacA(1-385), Km <sup>r</sup>                                                  | (Park <i>et al.</i> , 2022)  |
| pRE1-DacA(S73G)   | pRE1-based expression vector for DacA(S73G), Km <sup>r</sup>                                                   | (Park <i>et al.</i> , 2022)  |

|                            |                                                                      |            |
|----------------------------|----------------------------------------------------------------------|------------|
| pACYC184                   | A low copy number cloning vector; Cm <sup>R</sup> , Tet <sup>R</sup> |            |
| pACYC184-DacA              | pACYC184-based expression vector for DacA, Cm <sup>r</sup>           | This study |
| pACYC184-DacA( $\Delta$ C) | pACYC184-based expression vector for DacA(1-385), Cm <sup>r</sup>    | This study |

**Supplementary Table S2. Oligonucleotides used in this study**

| Name                       | Oligonucleotide sequence (5'–3')                                                | Use(s)                            |
|----------------------------|---------------------------------------------------------------------------------|-----------------------------------|
| DacC-3xFLAG-F              | GGGATTTTCGTGATGATGAAATTCCATCAGTGG<br>TTCGGCAGCTGGTTCTCTGTCGACCTGCAGGA<br>TTATAA |                                   |
| DacC-3xFLAG-R              | TTAATGACGTATAACCGGATGACGTTTCGCGC<br>CATCCGGTTATCAGAAGATTACGCCCG<br>CCCTGCCACT   |                                   |
| DacC( $\Delta$ C)-3xFLAG-F | CCATTGAGCAGCGTCCGCTGATCGTGATGGA<br>AAATGTGGAAGAGGGCGGAGTCGACCTGCAG<br>GATTATAA  | Chromosomal 3xFlag<br>tag         |
| DacD-3xFLAG-F              | GGGAAGGCAGCATGTTTTCTCGCCTGAGTGAT<br>TATTTCCACCATAAGGCCGTCGACCTGCAGG<br>ATTATAA  |                                   |
| DacD-3xFLAG-R              | TGATTATGCGAGCAGACTCGCACTCCTGCCA<br>GTCTGCTGCAAAAGAAAGGTTACGCCCG<br>CCCTGCCACT   |                                   |
| DacC-cfm-F                 | TGTGTGTGCGTTATTAATCACCAAACCTTAT                                                 |                                   |
| pET24-DacC-R               | GCTCGAATTCGGATCCTGAAGTACGCGCAGA<br>CGCAG                                        | Chromosomal 3xFlag<br>tag confirm |
| DacD-3xFLAG-cfm-F          | GCAAGAAAATTACTGCGTTGGGGGCAACAA                                                  |                                   |
| DacD-3xFLAG-cfm-R          | CTTCCTGCTTAATCTCGTAGTTCATGACGC                                                  |                                   |
| pBAD-DacA-F                | CTAGCAGGAGGAATTCATGAATACCATTTTTT<br>CCGC                                        |                                   |
| pBAD-DacA( $\Delta$ C)-R   | GCAGGTCGACTCTAGATTAGTTACCTTCCGGG<br>ATTTC                                       | pBAD24 cloning                    |
| pBAD-DacC-F                | CTAGCAGGAGGAATTCATGACGCAATACTCC<br>TCTC                                         |                                   |
| pBAD-DacC( $\Delta$ C)-R   | GCAGGTCGACTCTAGATTATCCGCCCTCTTCC<br>A CTTTT                                     |                                   |

pBAD-PBP1a-F CTAGCAGGAGGAATTCATGAAGTTCGTAAAG  
TATTT

pBAD-PBP1a-His-R GCAGGTCGACTCTAGATCAGTGGTGGTGGTG  
GTGGTGGTCGTCGTCGTCCTTGAACAATTCCT  
GTGCCTCGC

pBAD-PBP1b-F CTAGCAGGAGGAATTCATGGCCGGGAATGAC  
CGCGA

pBAD-PBP1b-His-R GCAGGTCGACTCTAGATCAGTGGTGGTGGTG  
GTGGTGGTCGTCGTCGTCCTTATTACTACCAA  
ACATATCCT

pBAD24-PBP2-F CTAGCAGGAGGAATTCATGAAACTACAGAAC  
TCTTT

pBAD24-PBP2-R GCAGGTCGACTCTAGATTAATGGTCCTCCGCT  
GCGG

pBAD-PBP2-His-R GCAGGTCGACTCTAGATCAGTGGTGGTGGTG  
GTGGTGGTCGTCGTCGTCCTTATGGTCCTCCG  
CTGCGGCAA

pBAD-PBP3-F CTAGCAGGAGGAATTCATGAAAGCAGCGGCG  
AAAAC

pBAD-PBP3-R GCAGGTCGACTCTAGATTACGATCTGCCACCT  
GTCC

pBAD-PBP3-His-R GCAGGTCGACTCTAGATCAGTGGTGGTGGTG  
GTGGTGGTCGTCGTCGTCCTTCGATCTGCCAC  
CTGTCCCCT

---

pET24-PBP1b-F AAGGAGATATACATATGGCCGGGAATGACCG  
CGA

pET-PBP1b-R GCTCGAATTCGGATCCTGGCAACTCGCCATC  
CGGTA

pET28-DacC-F CGCGCGGCAGCCATATGGCGGAACAAACCGT  
TGAAG

pET-DacC-R GCTCGAATTCGGATCCTGAAGTACGCGCAGA  
CGCAG

pET24 and pET28  
cloning

|                              |                                             |                  |
|------------------------------|---------------------------------------------|------------------|
| pET-DacC( $\Delta$ C)-R      | GCTCGAATTCGGATCCTTATCCGCCCTCTTCC<br>ACATTTT |                  |
| pACYC184-DacA-F              | GCCCATTCGGCCGCAAAGCCGAAGCCAGTA              |                  |
| pACYC184-DacA-R              | GATGCTTGGATCCTGGGGACGGAAATTACA              | pACYC184 cloning |
| pACYC184-DacA( $\Delta$ C)-R | GATGCTTGGATCCTTAGTTACCTTCCGGGAT<br>TTC      |                  |
| DacC(S66G)-F                 | AAACTGGATCCCGCGGGCCTGACTAAAATC              |                  |
| DacC(S66G)-R                 | CATGATTTTAGTCAGGCCCGCGGGATCCAG              |                  |
| PBP1b(E233Q)-F               | TACTTTGCTGGCGACACAAGACCGTCATTT              | Point mutant     |
| PBP1b(E233Q)-F               | AAATGACGGTCTTGTGTCGCCAGCAAAGTA              |                  |
| PBP1b(S510A)-F               | CGCGTCGTTTCGATTGGTGCCCTTGCAAAAC             |                  |
| PBP1b(S510A)-F               | GTTTTGCAAGGGCACCAATCGAACGACGCG              |                  |
| RT-16S rRNA-F                | AAATTGAAGAGTTTGATCATGGCTCAGATT              |                  |
| RT-16S rRNA-R                | AATGAGCAAAGGTATTAACTTTACTCCCTT              | qRT-PCR          |
| RT-DacC-F                    | ATGACGCAAT ACTCCTCTCT CCTTCGTGGT            |                  |
| RT-DacC-R                    | CCGGACTG GATAATCACA CCTTTGTTCA AG           |                  |

## References

Blattner FR, Plunkett G, 3rd, Bloch CA, Perna NT, Burland V, Riley M, Collado-Vides J, Glasner JD, Rode CK, Mayhew GF, Gregor J, Davis NW, Kirkpatrick HA, Goeden MA, Rose DJ, Mau B, Shao Y. 1997. The complete genome sequence of *Escherichia coli* K-12. *Science*. **277**:1453-1462. doi: <https://doi.org/>

Datsenko KA, Wanner BL. 2000. One-step inactivation of chromosomal genes in *Escherichia coli* K-12 using PCR products. *Proc Natl Acad Sci USA*. **97**:6640-6645. doi: <https://doi.org/10.1073/pnas.120163297>

Park SH, Kim YJ, Lee HB, Seok YJ, Lee CR. 2020. Genetic Evidence for Distinct Functions of Peptidoglycan Endopeptidases in *Escherichia coli*. *Front Microbiol*. **11**:565767. doi: <https://doi.org/10.3389/fmicb.2020.565767>

Park SH, Choi U, Ryu SH, Lee HB, Lee JW, Lee CR. 2022. Divergent Effects of Peptidoglycan Carboxypeptidase DacA on Intrinsic beta-Lactam and Vancomycin Resistance. *Microbiol Spectr*. e0173422. doi: <https://doi.org/10.1128/spectrum.01734-22>

Reddy P, Peterkofsky A, McKenney K. 1989. Hyperexpression and purification of *Escherichia coli* adenylate cyclase using a vector designed for expression of lethal gene products. *Nucleic Acids Research*. **17**:10473-10488. doi: <https://doi.org/10.1093/nar/17.24.10473>
